# Supplementary material for: Evaluating the Potential of Portulaca oleracea L. for Parkinson’s Disease Treatment Using a Drosophila Model with dUCH-Knockdown
Source: Hindawi journal article supplement (doi:10.1155/2019/1818259), 2019-04-18
Supplement: f1 [file 1818259.f1.pdf]

## Supplementary Materials

**Table S1:** Vitamin C equivalent antioxidant capacity (VCEAC) of the purslane extract

| <b>Purslane extract<br/>(mg/mL)</b> | <b>Vitamin C (mM)<br/>(mean <math>\pm</math> SE)</b> |
|-------------------------------------|------------------------------------------------------|
| 1.25                                | 0.24 $\pm$ 0.04                                      |
| 2.5                                 | 0.47 $\pm$ 0.09                                      |
| 5                                   | 0.94 $\pm$ 0.18                                      |
| 10                                  | 1.88 $\pm$ 0.36                                      |
| 15                                  | 2.83 $\pm$ 0.54                                      |
